# Supplementary material for: Ketogenic diet feeding improves aerobic metabolism property in extensor digitorum longus muscle of sedentary male rats
Source: PubMed Central journal article supplement (PMC7598508; doi:10.1371/journal.pone.0241382), 2020-10-30
Supplement: pone.0241382.s001.pdf [file pone.0241382.s001.pdf]

Bands for Fig.2

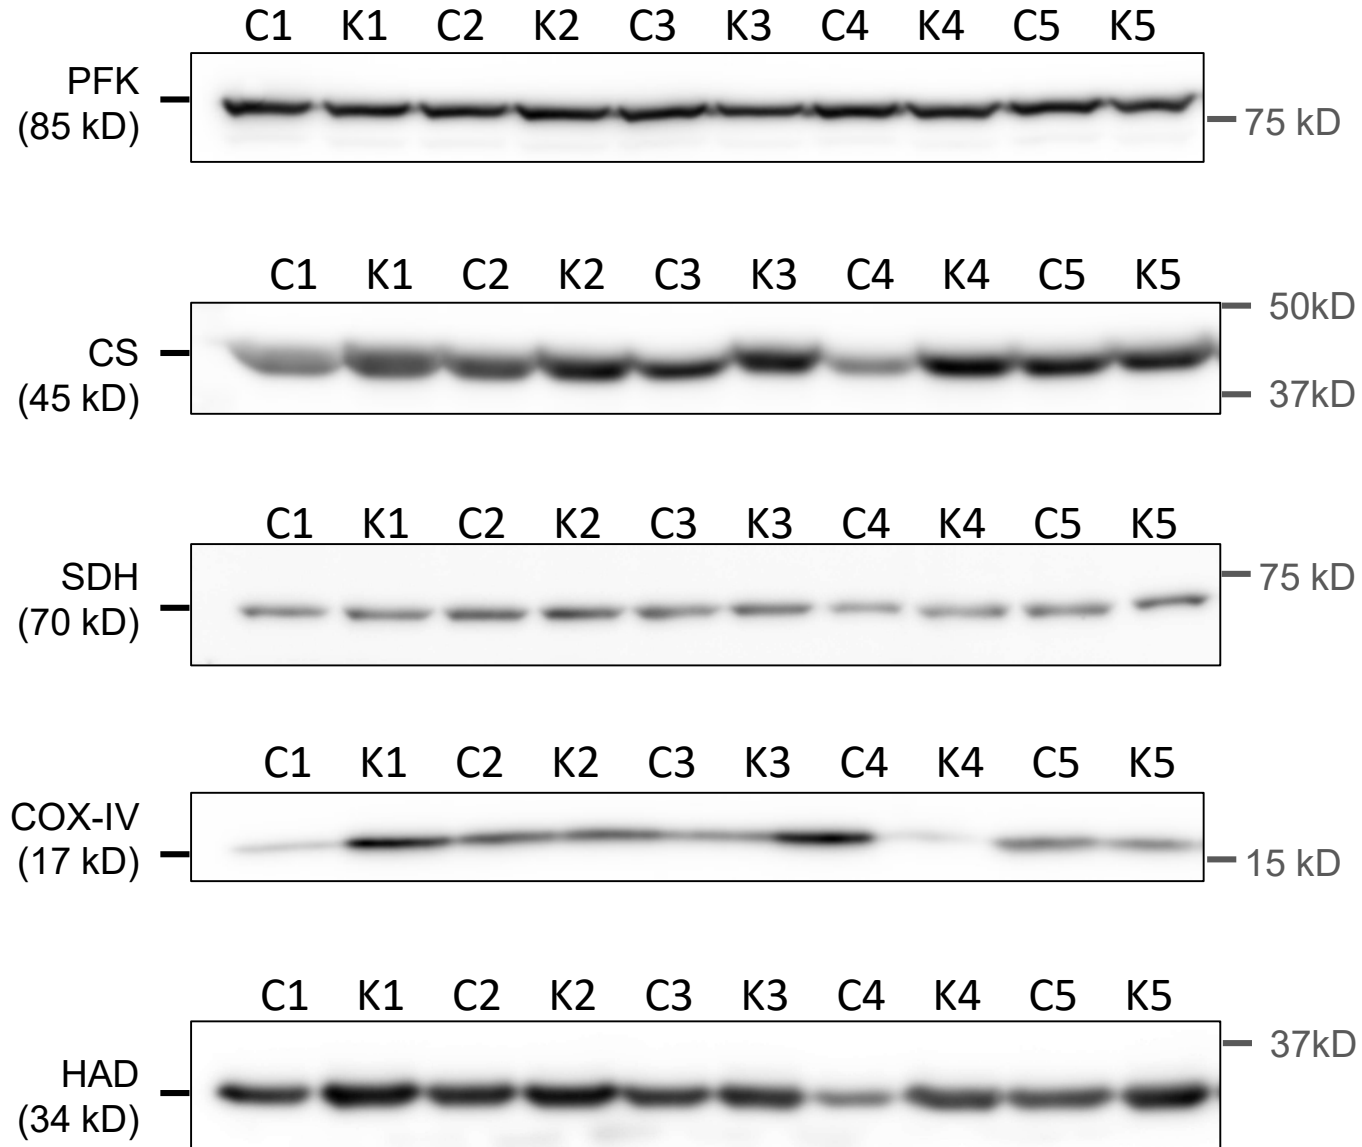

C indicates Control diet group.  
K indicates Ketogenic diet group.

Gel images for Fig.3

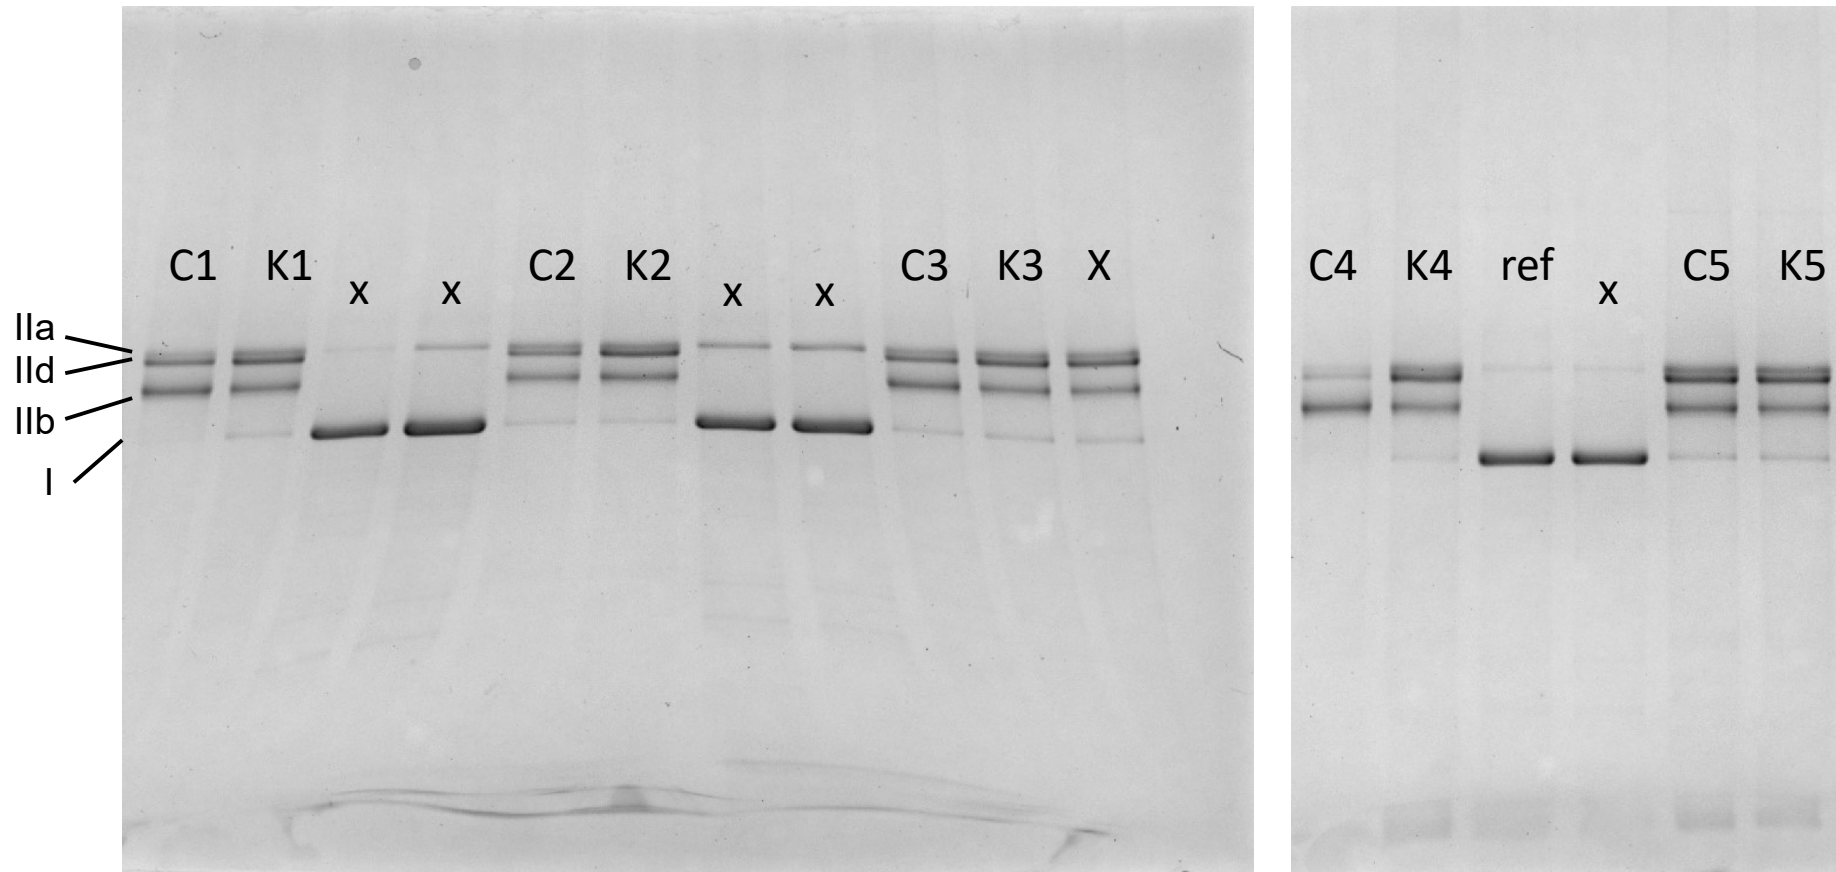

C indicates Control diet group.

K indicates Ketogenic diet group.

ref indicates reference bands.

x indicates un-related test sample for this manuscript.

Bands for Fig.3

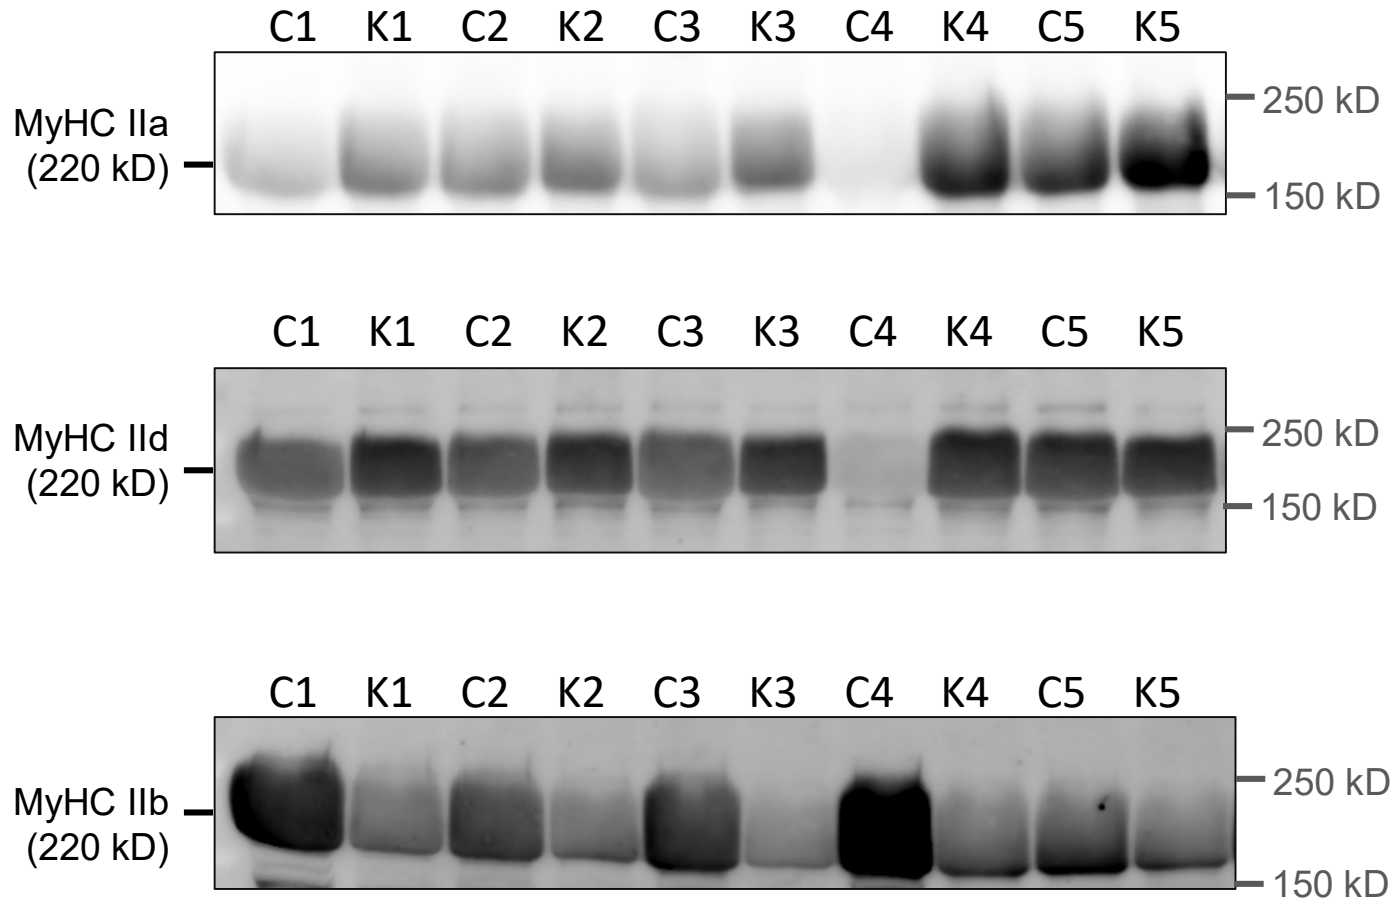

C indicates Control diet group.  
K indicates Ketogenic diet group.

Bands for Fig.4 and Fig.5

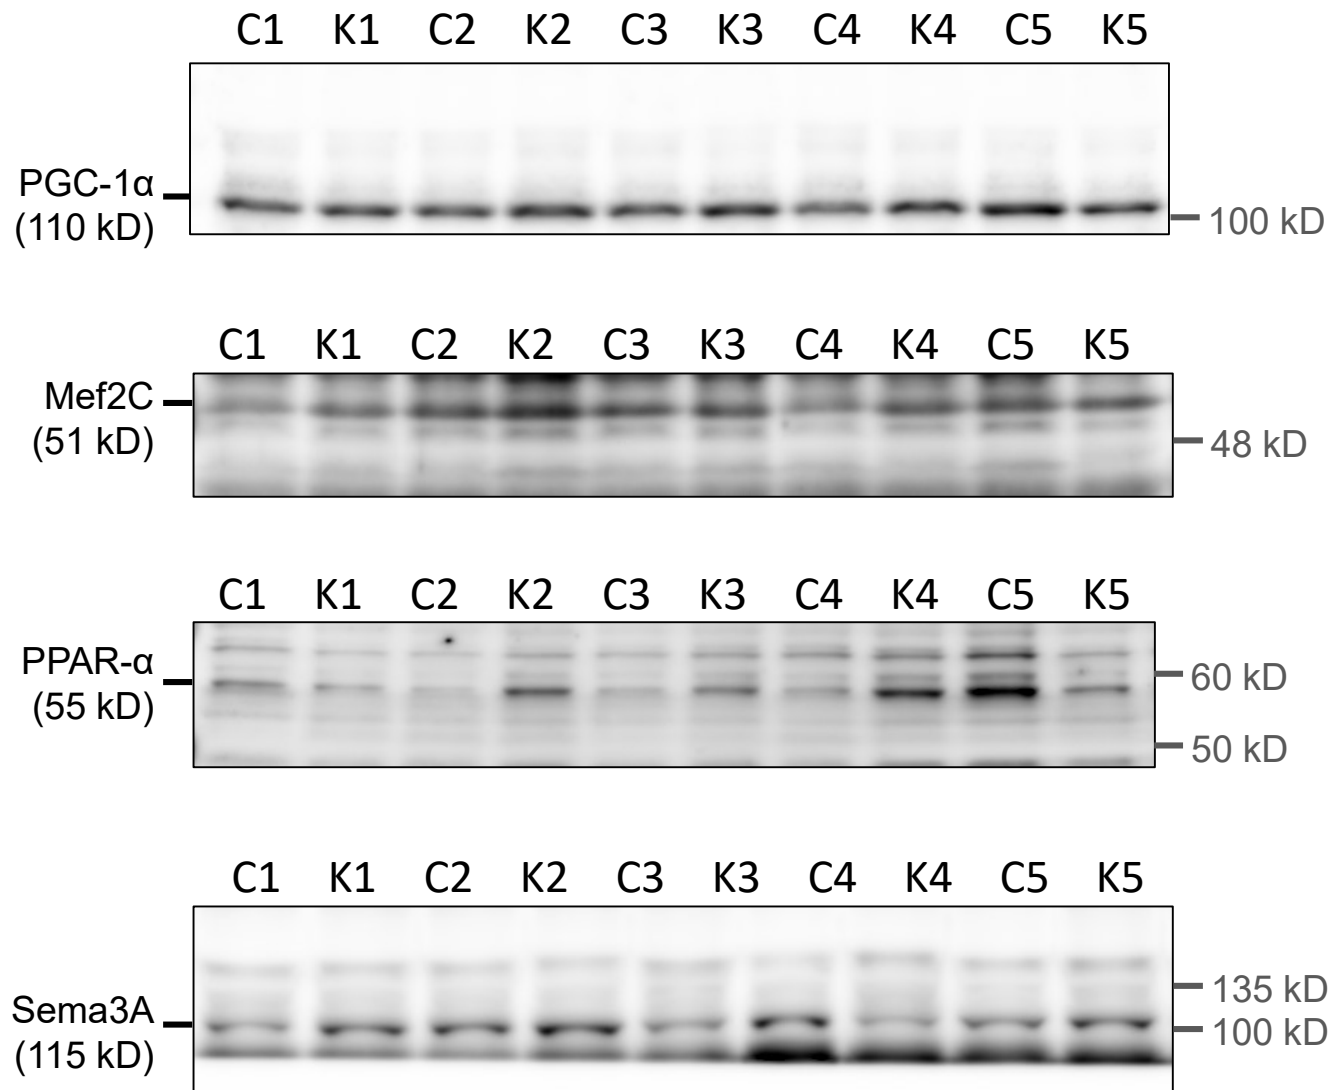

C indicates Control diet group.  
K indicates Ketogenic diet group.

Ponceau S stain for PFK

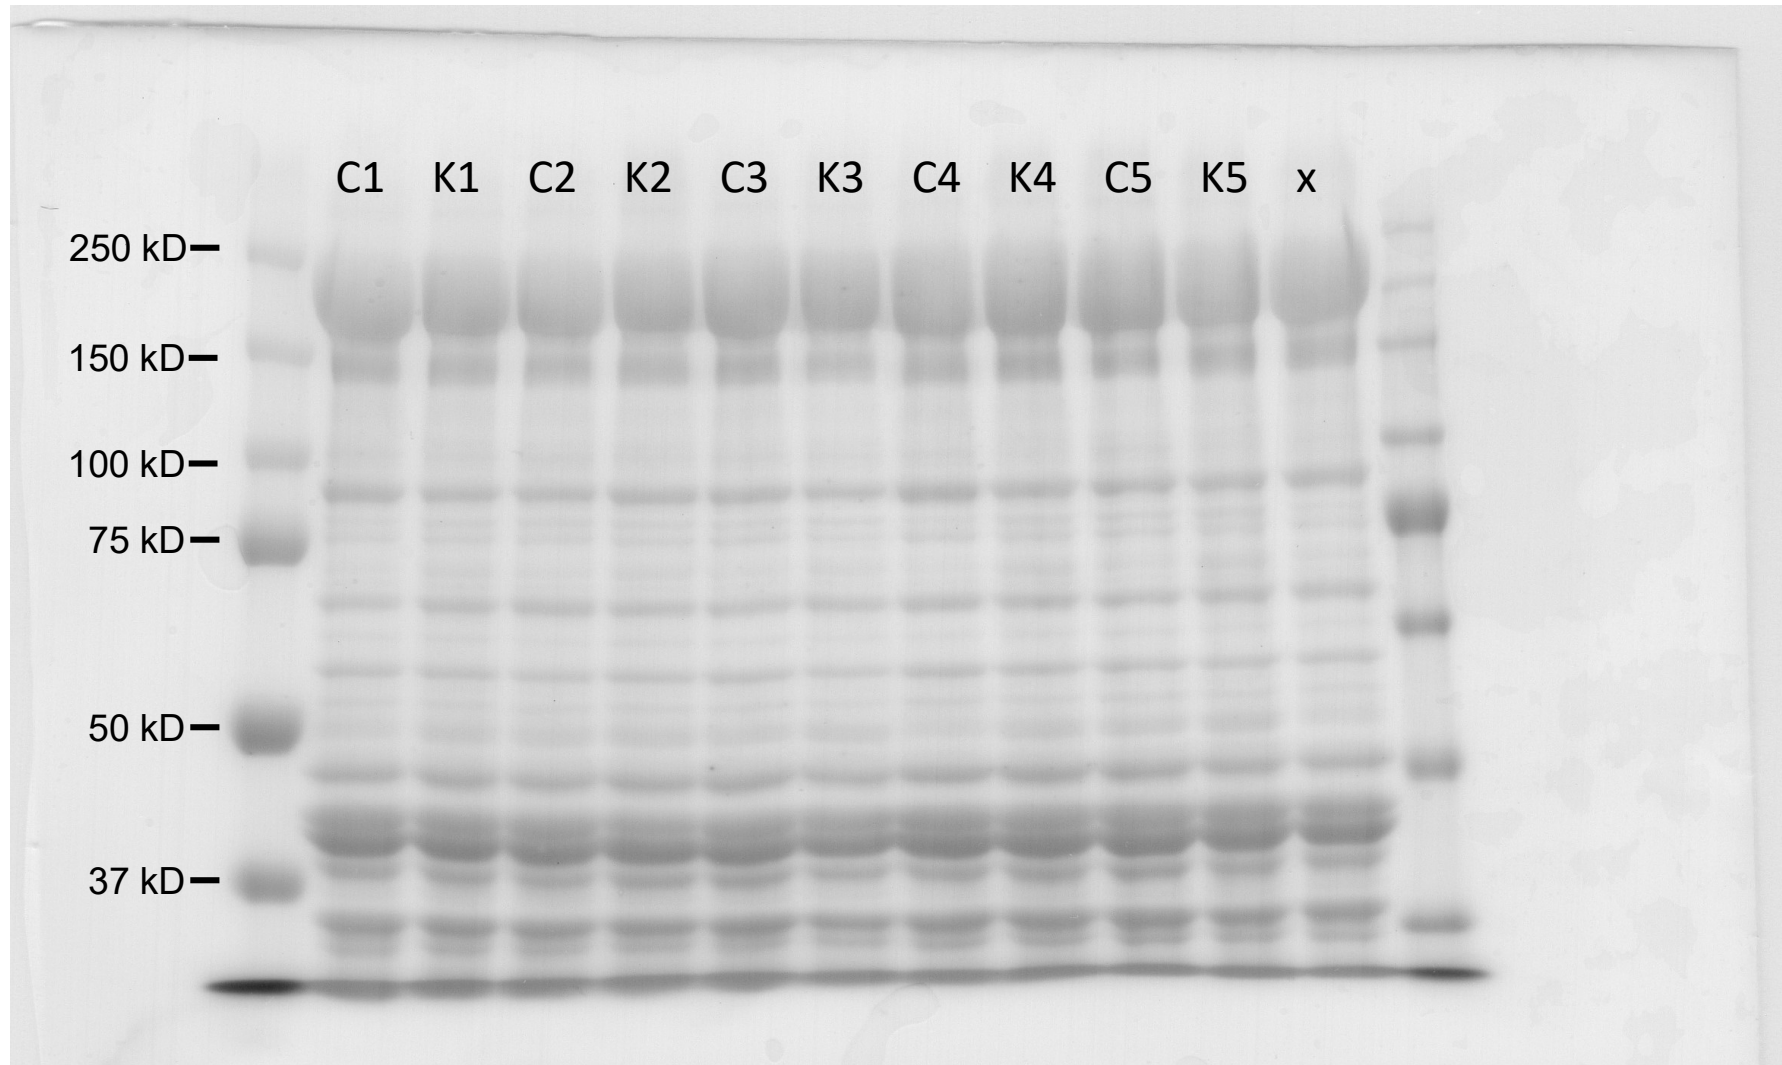

C indicates Control diet group.  
K indicates Ketogenic diet group.  
x indicates un-related sample for this manuscript.

Ponceau S stain for SDH, HAD

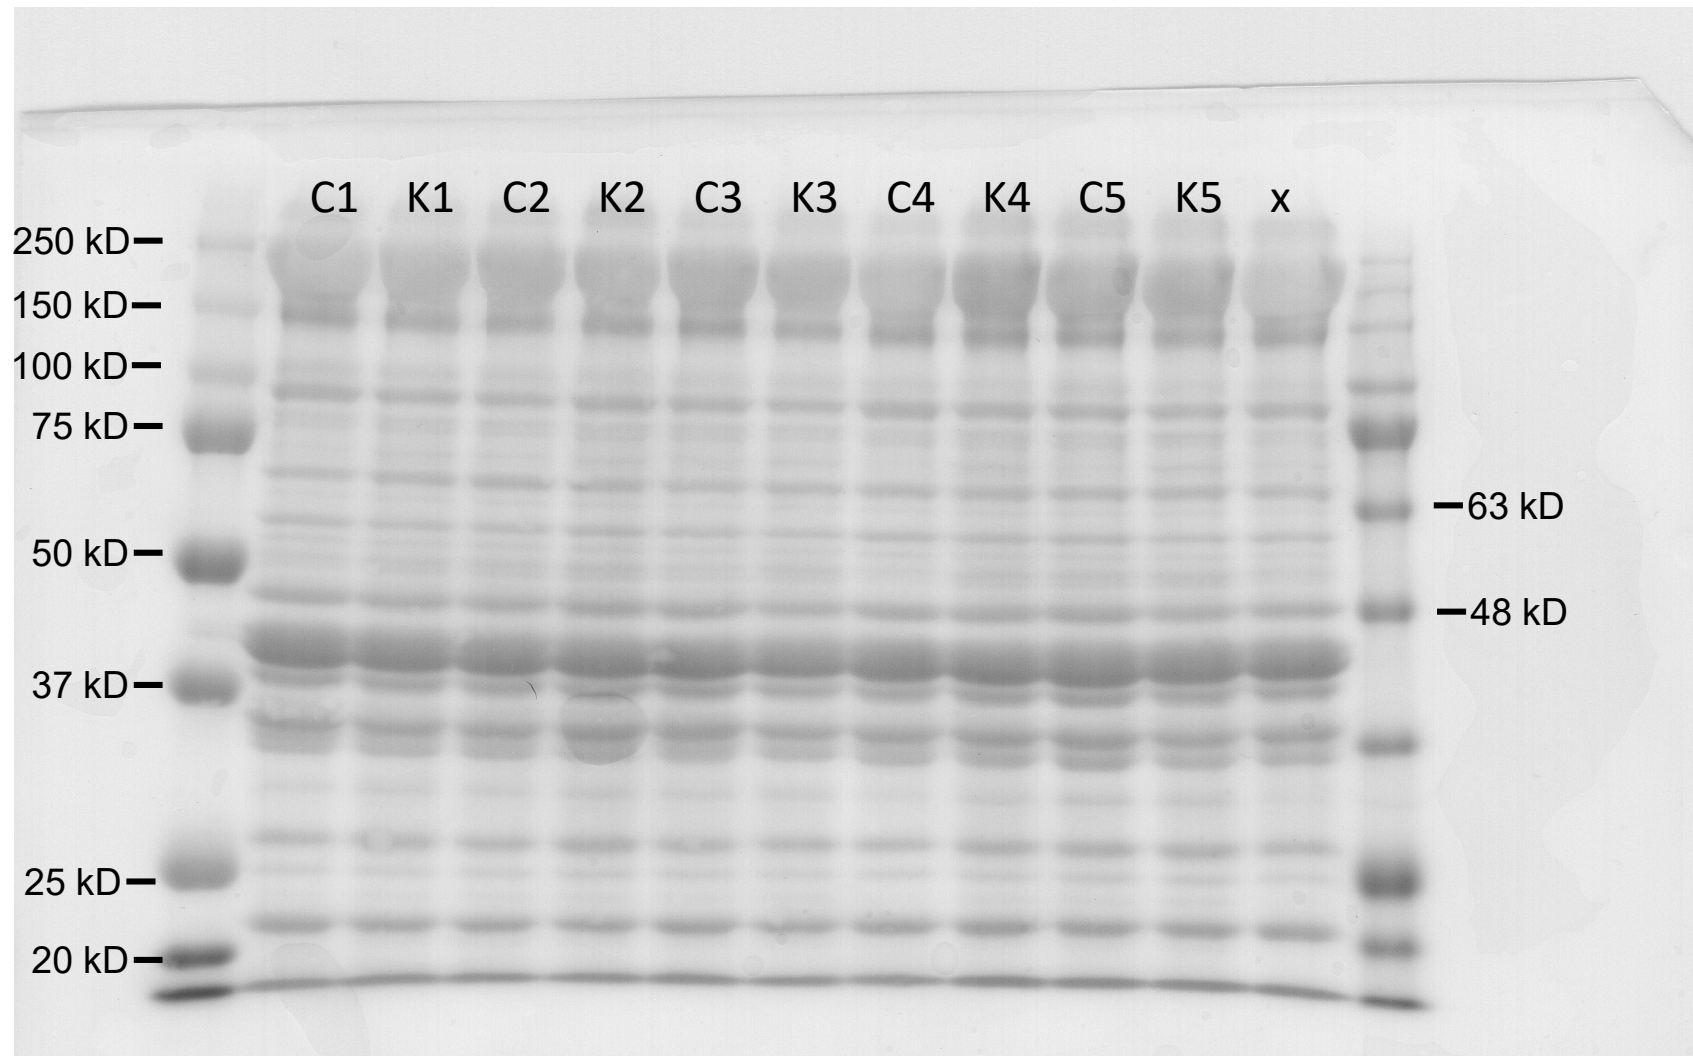

C indicates Control diet group.  
K indicates Ketogenic diet group.  
x indicates un-related sample for this manuscript.

Ponceau S stain for PGC-1 $\alpha$ , COX-IV

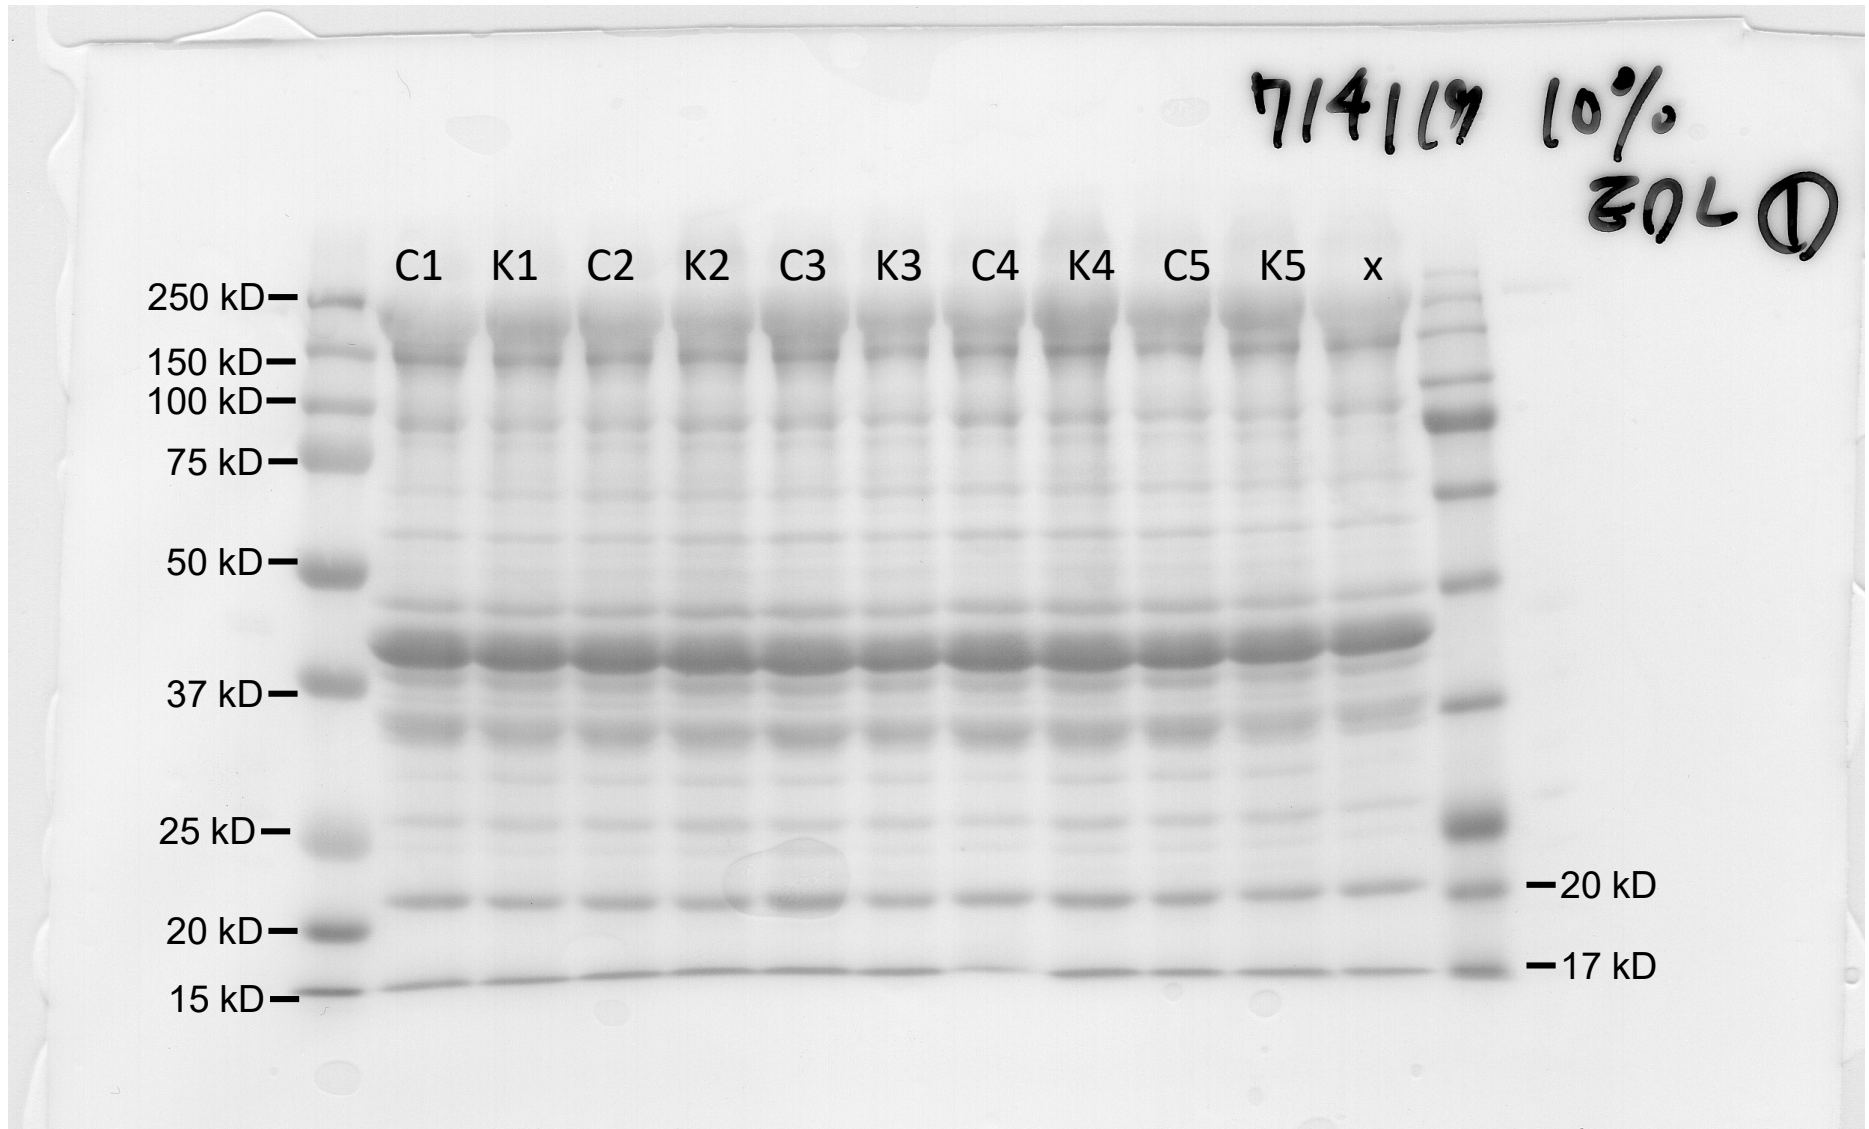

C indicates Control diet group.

K indicates Ketogenic diet group.

x indicates un-related sample for this manuscript.



Ponceau S stain for MyHC Ila

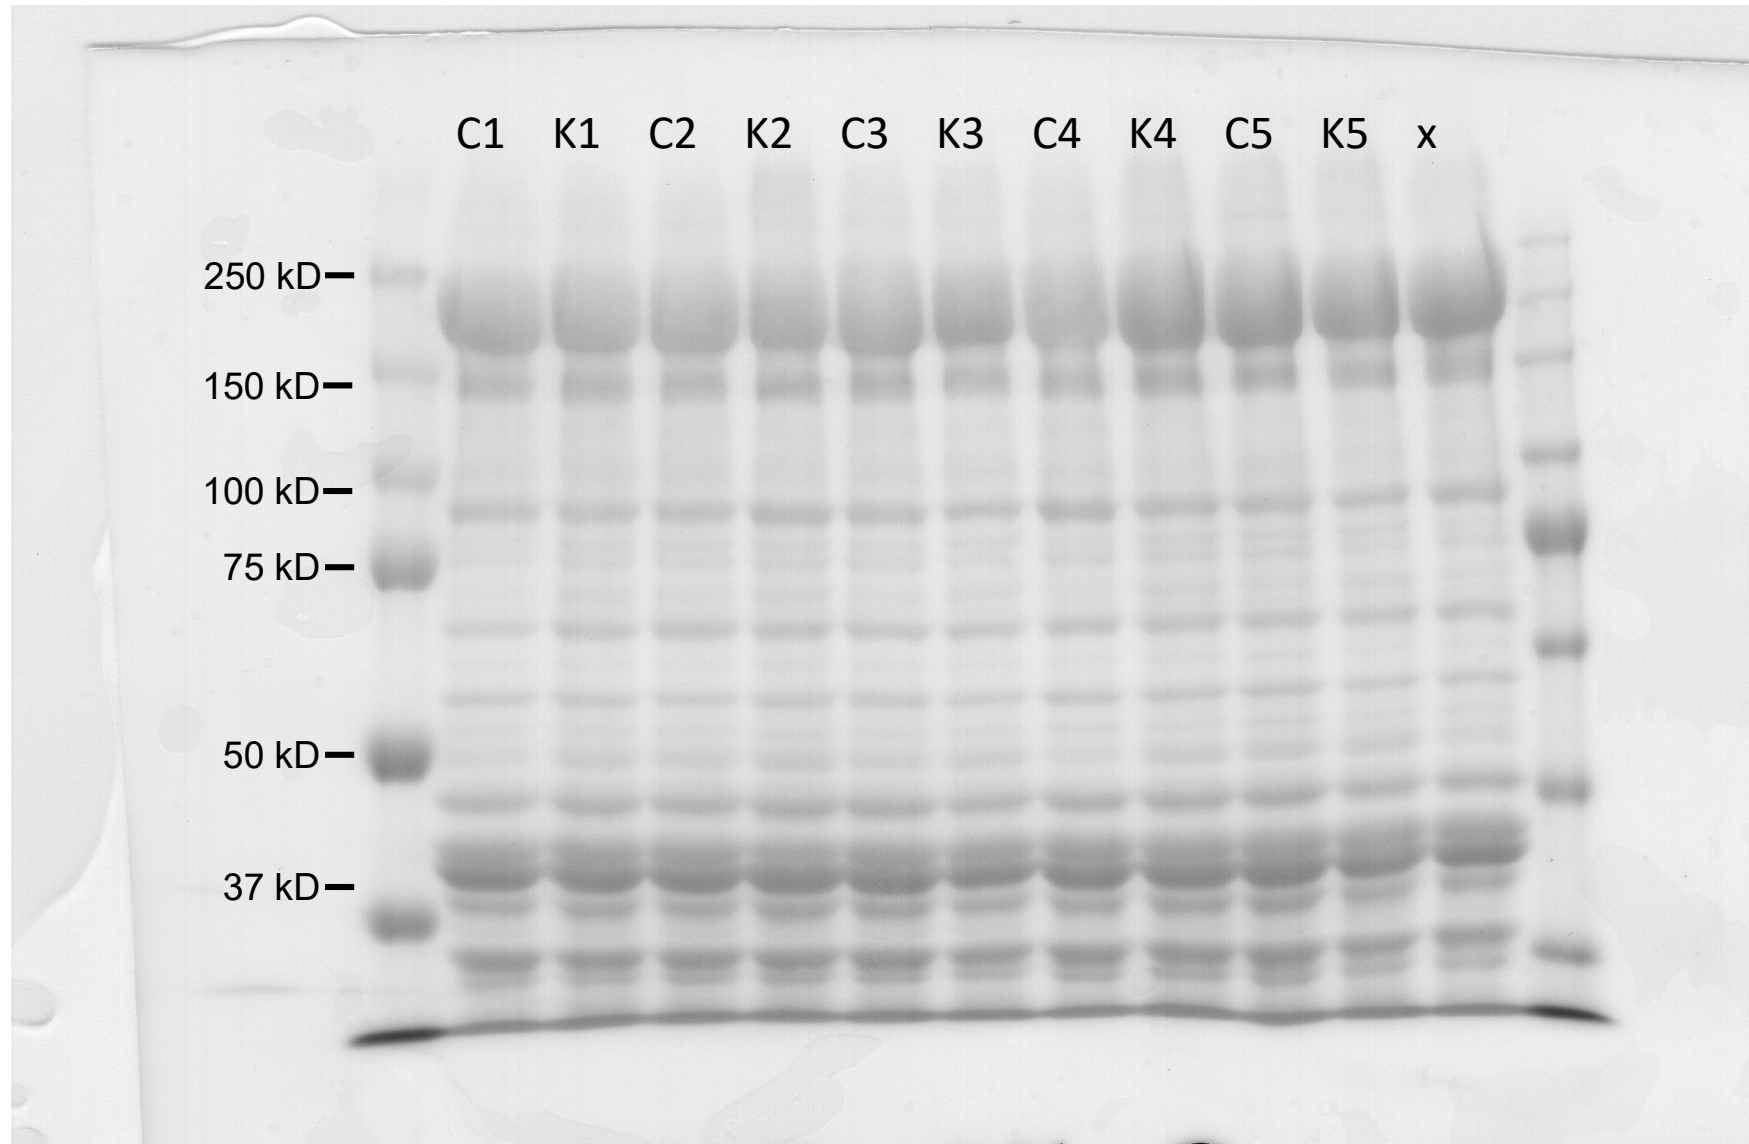

C indicates Control diet group.

K indicates Ketogenic diet group.

x indicates un-related sample for this manuscript.



Ponceau S stain for PPAR- $\alpha$ , Mef2c

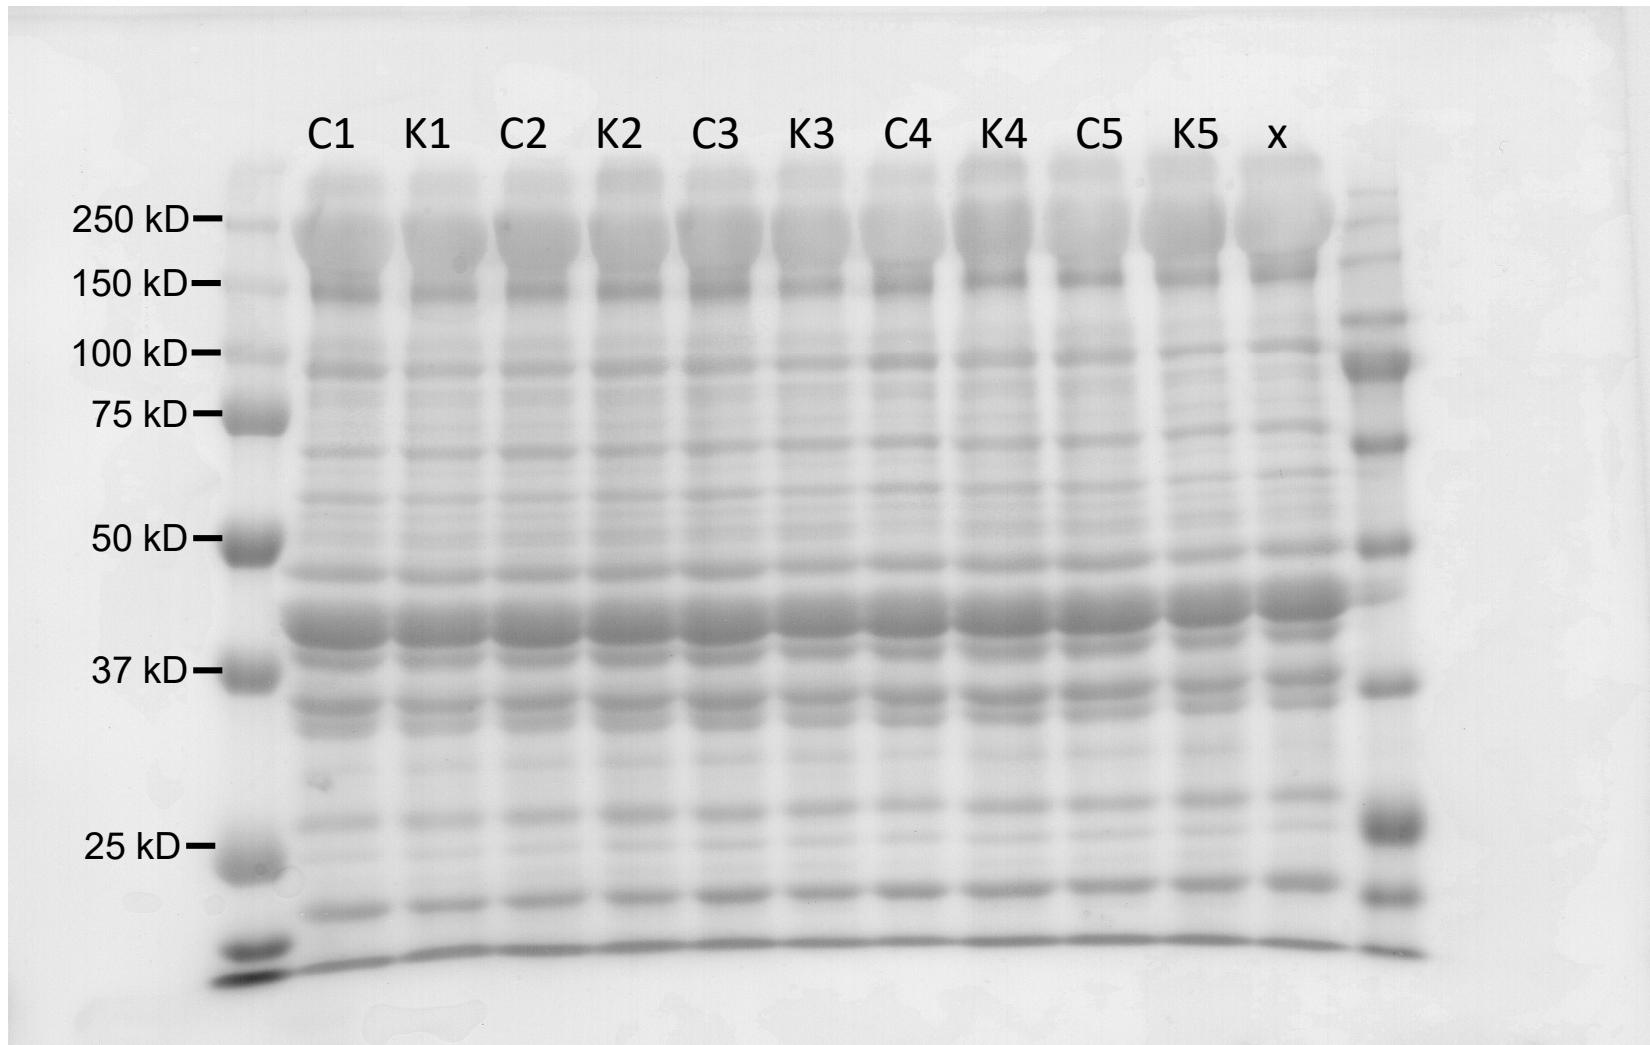

C indicates Control diet group.  
K indicates Ketogenic diet group.  
x indicates un-related sample for this manuscript.

Ponceau S stain for MyHC IIb

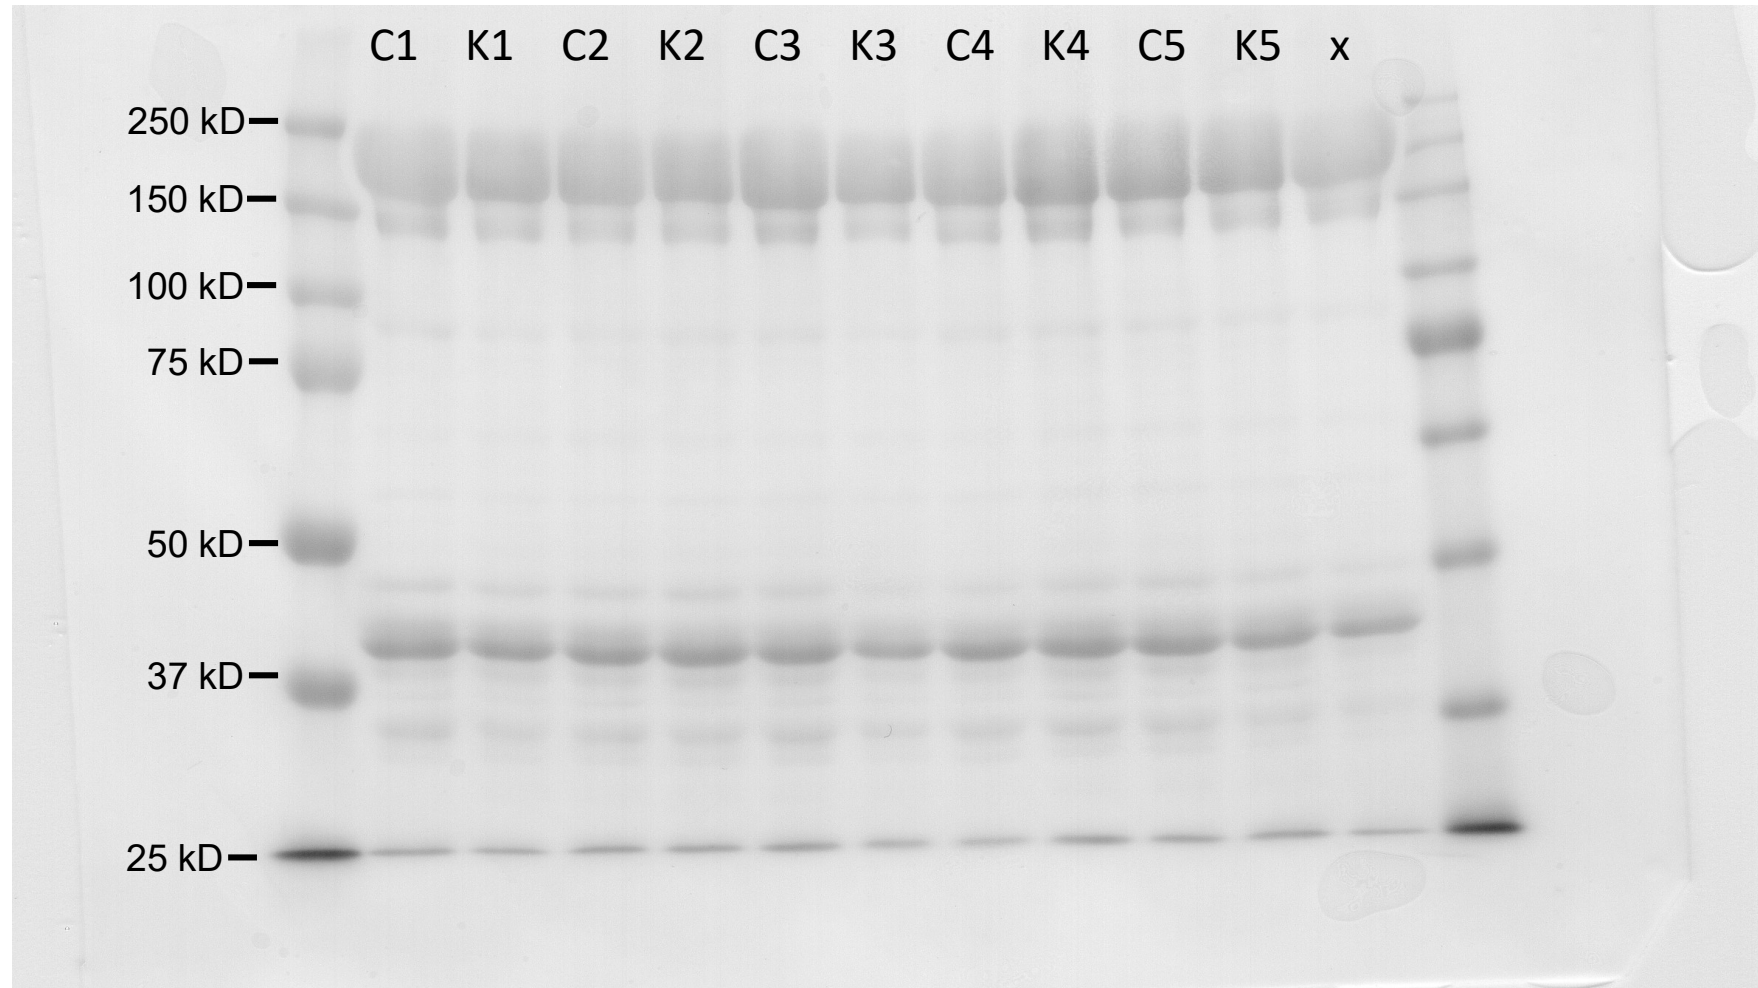

C indicates Control diet group.  
K indicates Ketogenic diet group.  
x indicates un-related sample for this manuscript.

Ponceau S stain for CS and Sema3A

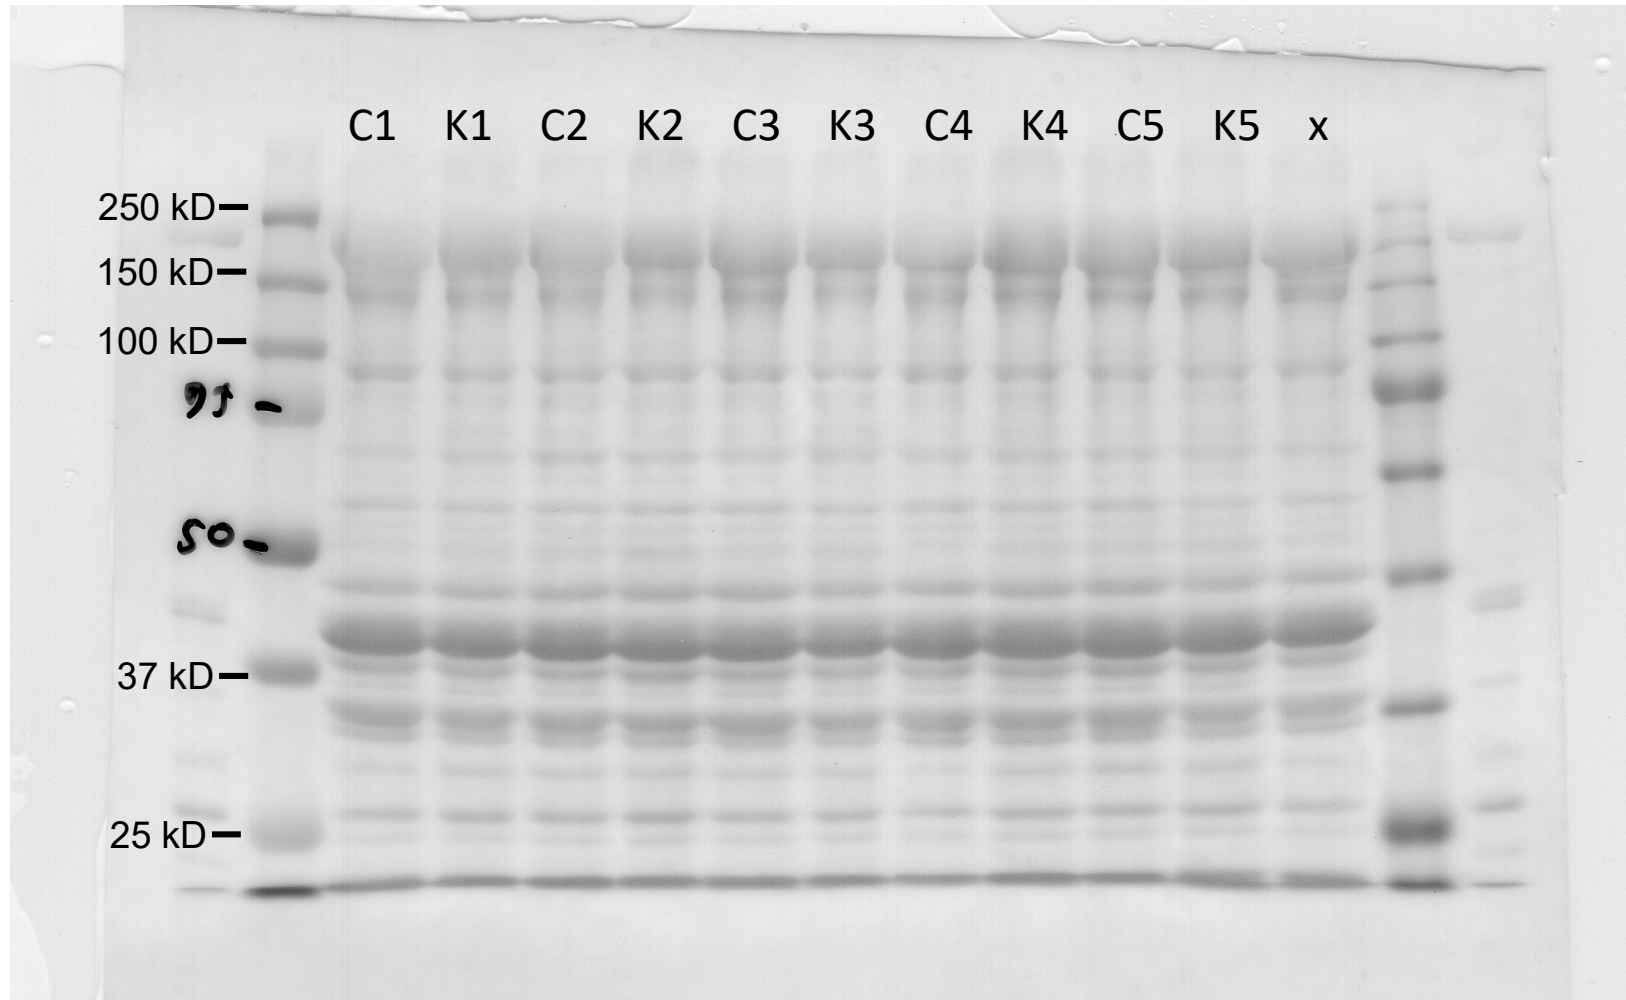

C indicates Control diet group.

K indicates Ketogenic diet group.

x indicates un-related sample for this manuscript.

Ponceau S stain for Mef2c and MyHC IId

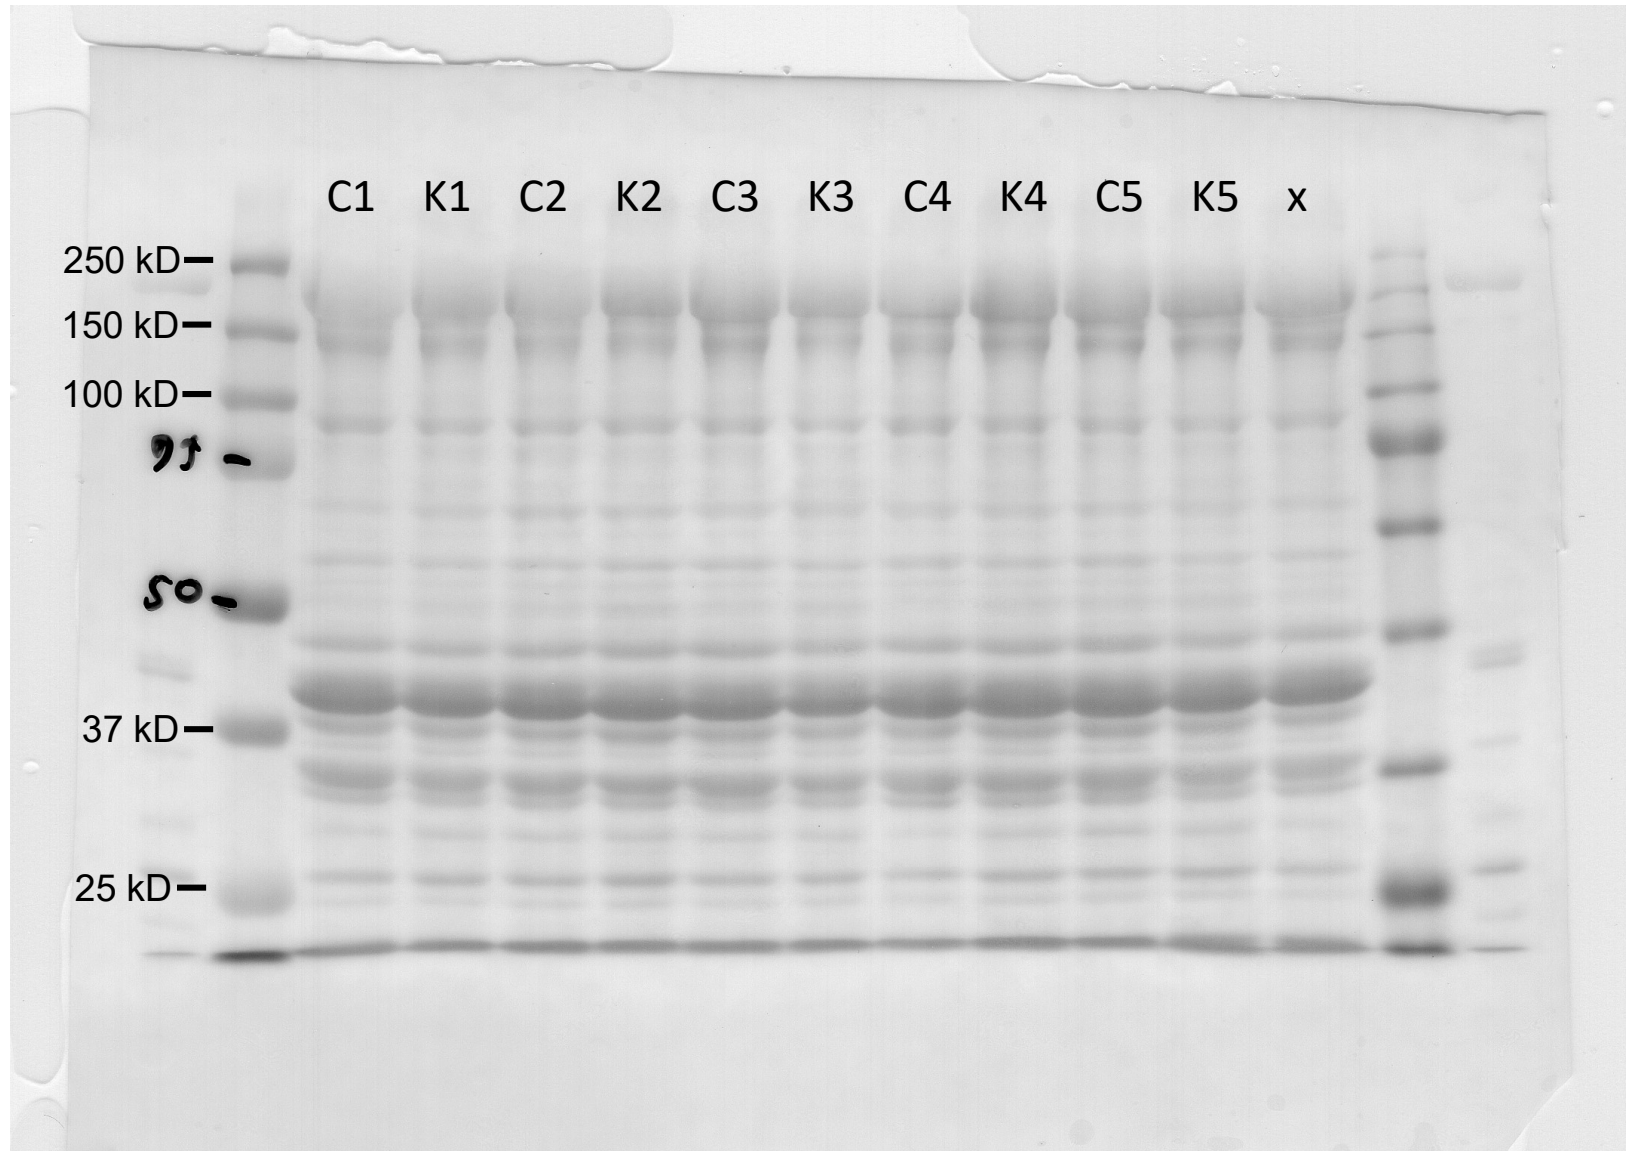

C indicates Control diet group.  
K indicates Ketogenic diet group.  
x indicates un-related sample for this manuscript.
